# Supplementary material for: The development and deployment of Common Data Elements for tissue banks for translational research in cancer – An emerging standard based approach for the Mesothelioma Virtual Tissue Bank
Source: PubMed Central journal article supplement (PMC2329649; doi:10.1186/1471-2407-8-91), 2008-04-08
Supplement: 1471-2407-8-91-S5.pdf [file 1471-2407-8-91-S5.pdf]

**MVB Common Data Elements for  
Collection of Mesothelioma Specimens  
PAPER FORMS**

**[Based on Data Dictionary Version 09/20/07 –  
Additional File # 4]**

## **USER INSTRUCTIONS**

### **Form Completion Guidelines:**

- 1) Priorities for completing the form are to fill out all required elements followed by any subset of data that will allow for inclusion in the MVB databank.
- 2) Any corrections of changes to the forms should be e-mailed to Nancy Whelan ([whelanb@upmc.edu](mailto:whelanb@upmc.edu)).

### **STEPS involved in initial screening, inclusion and classification of MVB cases**

#### **STEP 1 - Pre-screening cases (Research Assistant's Role)**

**Required Data Elements Pre-Check:** These data element searches are recommended before pathologist review. Make sure the case has the following REQUIRED data elements before beginning microscopic examination:

- ◆ At least 1 blocks are available on case that include mesothelioma or 1 block for biopsy-only or metastatic cases.
- ◆ Gender, Date of Birth, Date of Diagnosis, Asbestos Exposure History, and Vital Status must be available to qualify a case and should be collected BEFORE microscopic exam and central review by the pathologist is initiated.
- ◆ Also # Nodes Examined/Positive must be available.

**NOTE:** If these data elements are not found, make a record of this case this for later discussion. We must determine the exclusion rate and if too high we may need modified "required" (asterisked) data elements.

#### **STEP 2 - Pathologist Exam**

The "pre-screened case" is given to pathologist who begins data recording (Pathologist's Role).

Pathologist determines priorities for entering cases in resected mesothelioma block matrix (Pathologist's Role)

- ◆ Priorities for entering cases in neoplastic block matrix
- ◆ These should assist the teams in picking the highest value blocks for the MVB archives.
- ◆ Since the matrix can include up to 4 blocks here are the recommendations for selection criteria:
  - 1) The first block should include the largest nodule of tumor (as specified by the CDE).
  - 2) The third through fourth blocks should include surgical margin involvement (SM) or angiolymphatic invasion (AL) [in that order of preference].
  - 3) The second block should include the second largest tumor.

- 4) Additionally, try to include at least one block of normal lung if possible (two blocks are preferred). If it is not possible to find a completely normal block, then include one with minimal amounts of mesothelioma tumor.

**STEP 3 - Clinical Information Collection (Research Assistant's Role)**

If possible, fill out the remaining parts of the form and include the time it took to complete this subsection.

**STEP 4 - Biopsy CDE guidelines (Pathologist's Role)**

For biopsy cases, a matrix similar to the resection was developed and the criteria are:

- 1) Can include one block or more (up to a maximum of 5).
- 2) Must at least include one neoplastic block and classify according to the biopsy matrix.
- 3) Try to submit as many blocks as possible.

**STEP 5 - Frozen Tissue archive guidelines (Pathologist's Role)**

- ◆ Some of the frozen blocks in the matrix will also have paraffin tissue – please indicate this in the data element [Type of Block(s) Available].
- ◆ If there are only frozen blocks (site dependent), then please indicate this as described above.
- ◆ Try to include at least one block of normal lung if possible (two blocks are preferred). If it is not possible to find a completely normal block, then include one with minimal amounts of mesothelioma tumor.

**STEP 6 – Lymph Node/Metastasis CDE guidelines (Pathologist's Role)**

For lymph node and metastatic cases, the criteria are:

- ◆ Enter regional lymph node explorations prior to or equal to the resection date (but after the initial diagnostic biopsy) in the Lymph Node Block Matrix.
- ◆ Regional lymph nodes removed AFTER the resection of tumor, or distant lymph nodes should be entered in the Metastatic Tissue Block Matrix. Can include one block or more (up to a maximum of 5):
  - 1) Enter as many blocks available (Three blocks are preferred)
  - 2) If multiple metastatic sites are present, then enter at least 1 block from each site.
  - 3) Try to include at least 1 block of normal tissue from the same site if possible (or a block with minimal amounts of tumor).

## DEMOGRAPHICS - INTERNAL REFERENCE DATA

(This section is NOT to be supplied to MVB Central Data Center - only for internal record keeping use only and NOT to be passed on to Central Data Center)

\*1. MVB Number: \_\_\_\_\_

\*2. Institutional Identification Number \_\_\_\_\_

3. Last Name: \_\_\_\_\_

4. First Name: \_\_\_\_\_

5. Social Security Number: \_\_\_\_ - \_\_\_\_ - \_\_\_\_\_

# DEMOGRAPHIC DATA

\*1. MVB Number: \_\_\_\_\_

2. Race: (check one)

- |                                                          |                                      |                                                |
|----------------------------------------------------------|--------------------------------------|------------------------------------------------|
| <input type="checkbox"/> White                           | <input type="checkbox"/> Vietnamese  | <input type="checkbox"/> Samoan                |
| <input type="checkbox"/> Black                           | <input type="checkbox"/> Laotian     | <input type="checkbox"/> Tongan                |
| <input type="checkbox"/> American Indian/Aleutian/Eskimo | <input type="checkbox"/> Hmong       | <input type="checkbox"/> Melanesian            |
| <input type="checkbox"/> Asian, NOS                      | <input type="checkbox"/> Kampuchean  | <input type="checkbox"/> Fiji Islander         |
| <input type="checkbox"/> Chinese                         | <input type="checkbox"/> Thai        | <input type="checkbox"/> New Guinean           |
| <input type="checkbox"/> Japanese                        | <input type="checkbox"/> Micronesian | <input type="checkbox"/> Other Asian           |
| <input type="checkbox"/> Filipino                        | <input type="checkbox"/> Chamorran   | <input type="checkbox"/> Pacific Islander, NOS |
| <input type="checkbox"/> Hawaiian                        | <input type="checkbox"/> Guamanian   | <input type="checkbox"/> Other                 |
| <input type="checkbox"/> Korean                          | <input type="checkbox"/> Polynesian  | <input type="checkbox"/> Unknown               |
| <input type="checkbox"/> Asian Indian/Pakistani          | <input type="checkbox"/> Tahitian    |                                                |

3. Hispanic Origin: (circle one)      Yes      No

If Yes, please specify: (check one)

- |                                                                |                                                                      |
|----------------------------------------------------------------|----------------------------------------------------------------------|
| <input type="checkbox"/> Non-Spanish/Non-Hispanic              | <input type="checkbox"/> Other, specified Spanish or Hispanic origin |
| <input type="checkbox"/> Mexican, including Chicano            | <input type="checkbox"/> Spanish/Hispanic/Latino, NOS                |
| <input type="checkbox"/> Puerto Rican                          | <input type="checkbox"/> Spanish surname only                        |
| <input type="checkbox"/> Cuban                                 | <input type="checkbox"/> Dominican Republic                          |
| <input type="checkbox"/> South or Central America (NOT Brazil) | <input type="checkbox"/> Unknown                                     |

\*4. Gender: (circle one)      Male      Female      Unknown

5. Height: \_\_\_ \_\_\_ cm

6. Weight: \_\_\_ \_\_\_ kg

7. Managing Physician: \_\_\_\_\_

8. Primary Pathologist: \_\_\_\_\_

9. Date of Surgical procedure: \_\_\_ / \_\_\_ / \_\_\_ (MM/YYYY)

\*10. Birth date: \_\_\_ / \_\_\_ / \_\_\_ (MM/YYYY)

\*11. Date of First Positive Tissue Diagnosis of Mesothelioma: \_\_\_ / \_\_\_ / \_\_\_ (MM/YYYY)

12. General Demographic Comments: \_\_\_\_\_

---

---

---

# EPIDEMIOLOGIC DATA

Data elements for genetic susceptibility to environmental carcinogens and other occupation safety and health related to mesothelioma cases.

1. Location: (circle one)      Urban      Rural      Mixed      Unknown
- \*2. Past or Present History of Exposure to Asbestos: (circle one)  
Yes      No      Unknown
3. Past or Present Occupation(s): \_\_\_\_\_  
\_\_\_\_\_  
\_\_\_\_\_
4. History of Pulmonary Pathology: (circle one)      Yes      No      Unknown  
If Yes, please specify: \_\_\_\_\_  
\_\_\_\_\_  
\_\_\_\_\_
- \*5. History of Smoking:
- a. Circle one: Smoker (Current or Previous)      Current smoker      Previous smoker  
Non-smoker      Unknown
- b. If smoker, how many years smoked? \_\_\_\_\_
- c. If stopped, # of years since stopping? \_\_\_\_\_
- d. Cigarettes smoked per day? \_\_\_\_\_
- e. Pack years? \_\_\_\_\_
6. History of Alcohol Use: (circle one)      Current      Previous      None      Unknown
7. History of Other Cancer: (circle one)      Yes      No      Unknown
8. If Yes, please specify the type of cancer: (check all that apply)
- |                                                       |                                                 |                                          |
|-------------------------------------------------------|-------------------------------------------------|------------------------------------------|
| <input type="checkbox"/> Adrenal                      | <input type="checkbox"/> Larynx                 | <input type="checkbox"/> Rectosigmoid    |
| <input type="checkbox"/> Anus                         | <input type="checkbox"/> Leukemia               | <input type="checkbox"/> Rectum          |
| <input type="checkbox"/> Appendix                     | <input type="checkbox"/> Liver                  | <input type="checkbox"/> Skin            |
| <input type="checkbox"/> Bones                        | <input type="checkbox"/> Lung                   | <input type="checkbox"/> Spleen          |
| <input type="checkbox"/> Breast                       | <input type="checkbox"/> Lymph node             | <input type="checkbox"/> Stomach         |
| <input type="checkbox"/> Brain & CNS                  | <input type="checkbox"/> Mesothelioma           | <input type="checkbox"/> Testis          |
| <input type="checkbox"/> Colon                        | <input type="checkbox"/> Ovary                  | <input type="checkbox"/> Thyroid         |
| <input type="checkbox"/> Cervix Uteri                 | <input type="checkbox"/> Oral Cavity            | <input type="checkbox"/> Urinary Bladder |
| <input type="checkbox"/> Corpus Uteri                 | <input type="checkbox"/> Pancreatic             | <input type="checkbox"/> Other, NOS      |
| <input type="checkbox"/> Esophagus                    | <input type="checkbox"/> Parotid & Other Glands | <input type="checkbox"/> Unknown         |
| <input type="checkbox"/> Gallbladder                  | <input type="checkbox"/> Pharynx                | <input type="checkbox"/> None            |
| <input type="checkbox"/> Head & Neck                  | <input type="checkbox"/> Pleura                 | <input type="checkbox"/>                 |
| <input type="checkbox"/> Kidney, Renal Pelvis, Ureter | <input type="checkbox"/> Prostate               |                                          |
9. Family History of Cancer: (circle one)      Yes      No      Unknown
10. If Yes, please specify the type of cancer: (check all that apply)
- |                                      |                                       |                                       |
|--------------------------------------|---------------------------------------|---------------------------------------|
| <input type="checkbox"/> Adrenal     | <input type="checkbox"/> Larynx       | <input type="checkbox"/> Prostate     |
| <input type="checkbox"/> Anus        | <input type="checkbox"/> Leukemia     | <input type="checkbox"/> Rectosigmoid |
| <input type="checkbox"/> Appendix    | <input type="checkbox"/> Liver        | <input type="checkbox"/> Rectum       |
| <input type="checkbox"/> Bones       | <input type="checkbox"/> Lung         | <input type="checkbox"/> Skin         |
| <input type="checkbox"/> Breast      | <input type="checkbox"/> Lymph node   | <input type="checkbox"/> Spleen       |
| <input type="checkbox"/> Brain & CNS | <input type="checkbox"/> Mesothelioma | <input type="checkbox"/> Stomach      |
| <input type="checkbox"/> Colon       | <input type="checkbox"/> Ovary        | <input type="checkbox"/> Testis       |

- |                                                       |                                                 |                                          |
|-------------------------------------------------------|-------------------------------------------------|------------------------------------------|
| <input type="checkbox"/> Cervix Uteri                 | <input type="checkbox"/> Oral Cavity            | <input type="checkbox"/> Thyroid         |
| <input type="checkbox"/> Corpus Uteri                 | <input type="checkbox"/> Pancreatic             | <input type="checkbox"/> Urinary Bladder |
| <input type="checkbox"/> Esophagus                    | <input type="checkbox"/> Parotid & Other Glands | <input type="checkbox"/> Other, NOS      |
| <input type="checkbox"/> Gallbladder                  | <input type="checkbox"/> Pharynx                | <input type="checkbox"/> Unknown         |
| <input type="checkbox"/> Head and Neck                | <input type="checkbox"/> Larynx                 | <input type="checkbox"/> None            |
| <input type="checkbox"/> Kidney, Renal Pelvis, Ureter | <input type="checkbox"/> Pleura                 |                                          |

**11. First Degree Relatives with Mesothelioma: (check all that apply)**

- |                                  |                                       |                                      |
|----------------------------------|---------------------------------------|--------------------------------------|
| <input type="checkbox"/> Mother  | <input type="checkbox"/> Half Brother | <input type="checkbox"/> Grandfather |
| <input type="checkbox"/> Father  | <input type="checkbox"/> Half Sister  | <input type="checkbox"/> Grandmother |
| <input type="checkbox"/> Sister  | <input type="checkbox"/> Son          | <input type="checkbox"/> Unknown     |
| <input type="checkbox"/> Brother | <input type="checkbox"/> Daughter     | <input type="checkbox"/> None        |

**12. First Degree Relatives with Any Other Type of Cancer: (check all that apply)**

- |                                  |                                       |                                      |
|----------------------------------|---------------------------------------|--------------------------------------|
| <input type="checkbox"/> Mother  | <input type="checkbox"/> Half Brother | <input type="checkbox"/> Grandfather |
| <input type="checkbox"/> Father  | <input type="checkbox"/> Half Sister  | <input type="checkbox"/> Grandmother |
| <input type="checkbox"/> Sister  | <input type="checkbox"/> Son          | <input type="checkbox"/> Unknown     |
| <input type="checkbox"/> Brother | <input type="checkbox"/> Daughter     | <input type="checkbox"/> None        |

**13. Any Non-first Degree Relatives with Mesothelioma: (circle one)**

Yes                      No                      Unknown

**\*14. Any Imaging Study(ies) Done in the Patient? (check all that apply)**

- |                                     |                                            |                                     |                                  |
|-------------------------------------|--------------------------------------------|-------------------------------------|----------------------------------|
| <input type="checkbox"/> X-ray      | <input type="checkbox"/> Mammogram         | <input type="checkbox"/> Bone scan  | <input type="checkbox"/> Unknown |
| <input type="checkbox"/> CT scan    | <input type="checkbox"/> Angiogram         | <input type="checkbox"/> PET scan   |                                  |
| <input type="checkbox"/> MRI study  | <input type="checkbox"/> V-Q scan          | <input type="checkbox"/> ERCP study |                                  |
| <input type="checkbox"/> Ultrasound | <input type="checkbox"/> Radionuclide scan | <input type="checkbox"/> None       |                                  |

**15. General Epidemiologic Comments:** \_\_\_\_\_  
 \_\_\_\_\_  
 \_\_\_\_\_  
 \_\_\_\_\_

## **SPECIMEN AVAILABILITY (INVENTORY SUMMARY)**

This section will show the types of specimens available through the MVB resource.

1. Are Mesothelioma Resected specimens available? (circle one)

Yes                      No                      Unknown

2. Type(s) of Mesothelioma Resected specimens available: (check all that apply)

Paraffin     Bulk Frozen     Fresh Frozen     Glass Slides

3. Are Mesothelioma Biopsy specimens available? (circle one)

Yes                      No                      Unknown

4. Type(s) of Mesothelioma Biopsy specimens available: (check all that apply)

Paraffin     Bulk Frozen     Fresh Frozen     Glass Slides

5. Are Regional Lymph Node specimens available? (circle one)

Yes                      No                      Unknown

6. Type(s) of Regional Lymph Node specimens available: (check all that apply)

Paraffin     Bulk Frozen     Fresh Frozen     Glass Slides

7. Are Metastatic specimens available? (circle one)

Yes                      No                      Unknown

8. Type(s) of Metastatic specimens available: (check all that apply)

Paraffin     Bulk Frozen     Fresh Frozen     Glass Slides

9. Are Whole Blood samples available? (circle one)

Yes                      No                      Unknown

10. Are Plasma samples available? (circle one)

Yes                      No                      Unknown

11. Are Serum samples available? (circle one)

Yes                      No                      Unknown

12. Are Red Blood Cells (RBCs) available? (circle one)

Yes                      No                      Unknown

13. Are Peripheral Blood Mononuclear Cells (PBMCs) available? (circle one)

Yes                      No                      Unknown

14. Are DNA samples available? (circle one)

Yes                      No                      Unknown

15. Are Macroscopic images available? (circle one)

Yes                      No                      Unknown

16. Are Microscopic images available? (circle one)

Yes                      No                      Unknown



# ANATOMICAL PATHOLOGY CHARACTERISTICS

## Overall Histopathological Characteristics of Mesothelioma Specimen:

Enter the overall characteristics of the pathology resection specimen.

\*1. Accession Number (i.e. SP-91-645): \_\_\_\_\_ - \_\_\_\_\_ - \_\_\_\_\_

\*2. Months Between Diagnosis and Accession: \_\_\_\_\_ months

\*3. Type of Procedure: (check all that apply)

- |                                                     |                                                |                                               |
|-----------------------------------------------------|------------------------------------------------|-----------------------------------------------|
| <input type="checkbox"/> Core needle biopsy         | <input type="checkbox"/> Open thoracotomy      | <input type="checkbox"/> Lymph node resection |
| <input type="checkbox"/> Percutaneous needle biopsy | <input type="checkbox"/> Pleural resection     | <input type="checkbox"/> Lymph node biopsy    |
| <input type="checkbox"/> Incisional biopsy          | <input type="checkbox"/> Pneumonectomy         | <input type="checkbox"/> Other                |
| <input type="checkbox"/> Thoracoscopic biopsy       | <input type="checkbox"/> Pericardial resection | <input type="checkbox"/> Not Specified        |
| <input type="checkbox"/> Biopsy, not specified      | <input type="checkbox"/> Peritoneal resection  |                                               |

\*4. Site of Specimen: (check all that apply)

- |                                                |                                       |                                            |
|------------------------------------------------|---------------------------------------|--------------------------------------------|
| <input type="checkbox"/> Right visceral pleura | <input type="checkbox"/> Right pleura | <input type="checkbox"/> Pelvic peritoneum |
| <input type="checkbox"/> Left visceral pleura  | <input type="checkbox"/> Left pleura  | <input type="checkbox"/> Metastasis        |
| <input type="checkbox"/> Right parietal pleura | <input type="checkbox"/> Pleura       | <input type="checkbox"/> Other             |
| <input type="checkbox"/> Left parietal pleura  | <input type="checkbox"/> Pericardium  | <input type="checkbox"/> Not Specified     |
| <input type="checkbox"/> Diaphragmatic pleura  | <input type="checkbox"/> Peritoneum   |                                            |

5. Site of Metastasis: \_\_\_\_\_

6. Invasive Tumor Present? (circle one)

Yes                      No                      Unknown                      Not applicable

\*7. Primary or Metastatic Tumor? (circle one)

Primary                      Metastasis                      Not specified

\*8. Date of Resection or Biopsy: \_\_\_\_/\_\_\_\_/\_\_\_\_ (MM/YYYY)

9. Tumor Size:

Tumor size can be determined? (circle one)                      Yes                      No

Greatest dimension: \_\_\_\_ cm

Additional dimension: \_\_\_\_ cm

Maximum thickness: \_\_\_\_ cm

\*10. Most Prominent Histological Type of Invasive Cancer: (check one)

- |                                                    |                                      |                                        |
|----------------------------------------------------|--------------------------------------|----------------------------------------|
| <input type="checkbox"/> Epithelial or epithelioid | <input type="checkbox"/> Biphasic    | <input type="checkbox"/> Other         |
| <input type="checkbox"/> Sarcomatoid               | <input type="checkbox"/> Multicystic | <input type="checkbox"/> Not Specified |
| <input type="checkbox"/> Desmoplastic              | <input type="checkbox"/> Papillary   | <input type="checkbox"/> Unknown       |

\*11. Tumor Differentiation or Grade: (check one)

- |                                       |                                        |                                         |
|---------------------------------------|----------------------------------------|-----------------------------------------|
| <input type="checkbox"/> High         | <input type="checkbox"/> Low           | <input type="checkbox"/> Not specified  |
| <input type="checkbox"/> Intermediate | <input type="checkbox"/> Indeterminate | <input type="checkbox"/> Not applicable |

12. Size of Largest Individual Nodule of Cancer: \_\_\_\_ . \_\_\_\_ cm

\*13. Tumor Configuration: (check one)

- |                                    |                                    |                                  |
|------------------------------------|------------------------------------|----------------------------------|
| <input type="checkbox"/> Exophytic | <input type="checkbox"/> Papillary | <input type="checkbox"/> Diffuse |
|------------------------------------|------------------------------------|----------------------------------|

- Endophytic     Cystic     Localized  
 Nodular     Mixed     Not Specified

**14. Extent of Invasion: (check all that apply)**

- |                                                    |                                          |                                            |                                               |
|----------------------------------------------------|------------------------------------------|--------------------------------------------|-----------------------------------------------|
| <input type="checkbox"/> Lung parenchyma           | <input type="checkbox"/> Vertebra        | <input type="checkbox"/> Diaphragm         | <input type="checkbox"/> Other                |
| <input type="checkbox"/> Endothoracic fascia       | <input type="checkbox"/> Brachial plexus | <input type="checkbox"/> Peritoneum        | <input type="checkbox"/> Cannot be determined |
| <input type="checkbox"/> Contralateral pleura      | <input type="checkbox"/> Mediastinum     | <input type="checkbox"/> Omentum           | <input type="checkbox"/> Not applicable       |
| <input type="checkbox"/> Soft tissue of chest wall | <input type="checkbox"/> Pericardium     | <input type="checkbox"/> Abdominal viscera |                                               |
| <input type="checkbox"/> Rib                       | <input type="checkbox"/> Myocardium      | <input type="checkbox"/> Pelvic viscera    |                                               |

**15. Surgical Margin Involvement: (circle one)**

Yes                  No                  Unknown                  Not applicable

**16. Presence of Angiolymphatic Invasion: (circle one)**

Yes                  No                  Unknown                  Not applicable

**17. Extrapleural, Extraperitoneal or Extrapericardial Extension: (circle one)**

Yes                  No                  Unknown                  Not applicable

**18. Additional Pathologic Findings: (check all that apply)**

- |                                                          |                                               |                                                      |
|----------------------------------------------------------|-----------------------------------------------|------------------------------------------------------|
| <input type="checkbox"/> Ferruginous bodies              | <input type="checkbox"/> Acute inflammation   | <input type="checkbox"/> Changes of talc pleurodesis |
| <input type="checkbox"/> Pleural plaques                 | <input type="checkbox"/> Chronic inflammation | <input type="checkbox"/> Other                       |
| <input type="checkbox"/> Pulmonary interstitial fibrosis | <input type="checkbox"/> Mixed inflammation   | <input type="checkbox"/> None identified             |

**19. Histochemical Profile:** \_\_\_\_\_  
 \_\_\_\_\_

**20. Immunohistochemical Profile:** \_\_\_\_\_  
 \_\_\_\_\_

**21. Ultrastructural Findings:** \_\_\_\_\_  
 \_\_\_\_\_

**22. General Comments Section on Resection/Biopsy:** \_\_\_\_\_  
 \_\_\_\_\_  
 \_\_\_\_\_

**Neoplastic Paraffin Block Matrix: (These are multiple entry fields. Up to 4 blocks preferred)**

The Paraffin block matrix section will allow the collection of block details on cases that meet the minimum requirements for inclusion into the resource.

**NOTE:** Priorities for entering cases in resected mesothelioma block matrix.

- These should assist the teams in picking the highest value blocks for the MVB archives.

- Since the matrix can include up to 4 blocks here are the recommendations for selection criteria:

- 1) The ***first block*** should include the largest nodule of tumor (as specified by the CDE)
- 2) The ***third and fourth blocks*** should include surgical margin involvement (SM) or angiolymphatic invasion (AL) (in that order of preference).

**NOTE:** If SM, and AL do not occur, select the next largest area of tumor for 3 and 4 block of the matrix.

3) The second block should include the second largest tumor.

1. Block Matrix: Type(s) of Block(s) Available: (check one)

Paraffin       Frozen       Both

2. Block Matrix: Accession Number (i.e. SP-91-645):

\_\_\_\_ - \_\_\_\_ - \_\_\_\_ - \_\_\_\_ - \_\_\_\_

3. Paraffin Block Matrix: Block Number (i.e. 1A, 12AA): \_\_\_\_ - \_\_\_\_ - \_\_\_\_

4. Paraffin Block Matrix: Most Prominent Histological Type: (check one)

Epithelial or epithelioid     Biphasic     Other  
 Sarcomatoid                     Multicystic     Not Specified  
 Desmoplastic                     Papillary     Unknown

5. Paraffin Block Matrix: Size of Largest Individual Nodule of Cancer:

\_\_\_\_ . \_\_\_\_ cm

6. Paraffin Block Matrix: Presence of Positive Surgical Margin (SM): (circle one)

Yes                  No                  Unknown                  Not applicable

7. Paraffin Block Matrix: Presence of Angiolymphatic Invasion (AL): (circle one)

Yes                  No                  Unknown                  Not applicable

8. Paraffin Block Matrix: Block Comments: \_\_\_\_\_  
\_\_\_\_\_  
\_\_\_\_\_

### **Non-Neoplastic Paraffin Block Matrix:**

Try to include at least one block of normal lung if possible (two blocks are preferred). If it is not possible to find a completely normal block then include one with minimal amounts of mesothelioma tissue.

1. Paraffin Resection Specimen Non-Neoplastic Block #1 (i.e. 1A, 12AA):

\_\_\_\_ - \_\_\_\_ - \_\_\_\_

2. Paraffin Resection Specimen Non-Neoplastic Block #2 (i.e. 1A, 12AA):

\_\_\_\_ - \_\_\_\_ - \_\_\_\_

3. General Comments on Paraffin Blocks: \_\_\_\_\_  
\_\_\_\_\_  
\_\_\_\_\_

### **Neoplastic Frozen Bulk Block Matrix:** (These are multiple entry fields. Up to 4 blocks preferred)

Same as above.

**NOTE: This section is for the FROZEN BLOCK matrix.**

It is very possible that some (or all) of the frozen blocks in the matrix will also have paraffin tissue. When this happens, indicate this in data element [Type of Block(s) available]. On occasion there may be some blocks that are only frozen (site dependent) - also indicate this in the aforementioned data items.

**1. Block Matrix: Type(s) of Block(s) Available: (check one)**

Paraffin       Frozen       Both

**2. Frozen Tissue: Warm Ischemic Time: \_\_\_ \_\_\_ \_\_\_ minutes**

**3. Frozen Block Matrix: Block Number (i.e. 1A, 12AA): \_\_\_ \_\_\_ \_\_\_**

**4. Frozen Block Matrix: Most Prominent Histological Type: (check one)**

Epithelial or epithelioid       Biphasic       Other  
 Sarcomatoid       Multicystic       Not Specified  
 Desmoplastic       Papillary       Unknown

**5. Frozen Block Matrix: Size of Largest Individual Nodule of Cancer:  
\_\_\_ . \_\_\_ \_\_\_ cm**

**6. Frozen Block Matrix: Presence of Positive Surgical Margin (SM): (circle one)**

Yes      No      Unknown      Not applicable

**7. Frozen Block Matrix: Presence of Angiolymphatic Invasion (AL): (circle one)**

Yes      No      Unknown      Not applicable

**8. Frozen Block Matrix: Block Comments: \_\_\_\_\_**  
\_\_\_\_\_  
\_\_\_\_\_

**Non-neoplastic Bulk Frozen Blocks:**

Try to include at least one block of normal lung if possible (two blocks are preferred). If it is not possible to find a completely normal block then include one with minimal amounts of mesothelioma tissue.

**1. Frozen Resection Specimen Non-Neoplastic Block #1 (i.e. 1A, 12AA):**

\_\_\_ \_\_\_ \_\_\_

**2. Frozen Resection Specimen Non-Neoplastic Block #2 (i.e. 1A, 12AA):**

\_\_\_ \_\_\_ \_\_\_

**3. General Comments on Frozen Blocks: \_\_\_\_\_**  
\_\_\_\_\_  
\_\_\_\_\_

**Biopsy Block Matrix:**

The biopsy block matrix section will allow the collection of block details on biopsy samples that meet the minimum requirements for inclusion into the Resource.

- For biopsy cases, the concern is to give the reviewers some guidance on how many blocks to submit and to clarify what happens when there is only one block with tumor. In these cases it will be recommended that the institution cut 3 to 5 blanks for their own diagnostic purposes and then make the residual material available to the MVB archive.
- A matrix block will be set up and leave the number of blocks submitted to the reviewing pathologist, encouraging them to submit as many blocks as possible on a biopsy to a maximum of 5. There will be no particular order for entering blocks into the biopsy matrix.

- The recommended criteria for biopsy will be as follows:

- 1) Can include one block or more (up to 5)
- 2) Must at least include one neoplastic block and classify according to the biopsy matrix.

1. Biopsy Block Matrix: Block Number (i.e. 1A, 12AA): \_\_\_\_ \_

2. Biopsy Block Matrix: Most Prominent Histological Type: (check one)

- |                                                    |                                      |                                        |
|----------------------------------------------------|--------------------------------------|----------------------------------------|
| <input type="checkbox"/> Epithelial or epithelioid | <input type="checkbox"/> Biphasic    | <input type="checkbox"/> Other         |
| <input type="checkbox"/> Sarcomatoid               | <input type="checkbox"/> Multicystic | <input type="checkbox"/> Not Specified |
| <input type="checkbox"/> Desmoplastic              | <input type="checkbox"/> Papillary   | <input type="checkbox"/> Unknown       |

3. Biopsy Block Matrix: Grade: (check one)

- |                                       |                                        |                                         |
|---------------------------------------|----------------------------------------|-----------------------------------------|
| <input type="checkbox"/> High         | <input type="checkbox"/> Low           | <input type="checkbox"/> Not specified  |
| <input type="checkbox"/> Intermediate | <input type="checkbox"/> Indeterminate | <input type="checkbox"/> Not applicable |

4. Biopsy Block Matrix: Size of Largest Individual Nodule of Cancer:  
\_\_\_\_ . \_\_\_\_ cm

5. Biopsy Block Matrix: Presence of Angiolymphatic Invasion (AL): (circle one)  
Yes                  No                  Unknown                  Not applicable

6. Biopsy Block Matrix: Block Comments: \_\_\_\_\_  
\_\_\_\_\_  
\_\_\_\_\_

### Regional Lymph Node Status at Time of Resection:

Include the lymph node status at the time of the resection.

-If there is regional lymph node exploration prior or equal to the resection date, but after the initial diagnostic biopsy, then enter values here (in the Lymph Node Block Matrix section).

-Regional lymph nodes removed after the resection of tumor or distant lymph nodes should be enter in the Metastatic Tissue Block Matrix section.

1. Date of Regional Lymph Node Resection: \_\_\_\_ / \_\_\_\_ \_\_\_\_ (MM/YYYY)

2. Number of Lymph Nodes Examined: \_\_\_\_

3. Number of Lymph Nodes Positive: \_\_\_\_

4. Lymph Node Block Matrix: Non-Neoplastic Block Number (i.e. 1A, 12AA):  
\_\_\_\_

5. Lymph Node Block Matrix: Neoplastic Block Number (i.e. 1A, 12AA):  
\_\_\_\_

6. Lymph Node Block Matrix: Size of Largest Individual Nodule of Cancer:  
\_\_\_\_ . \_\_\_\_ cm

7. Lymph Node Block Matrix: Presence of Extracapsular Extension (ECE):  
(circle one)      Yes                  No                  Unknown

8. General Comments Section for Lymph Nodes: \_\_\_\_\_  
\_\_\_\_\_  
\_\_\_\_\_

## **Recurrence/Metastasis Data:**

**Metastatic Tissue Block Matrix** for cases that have tissue available through the resource from anatomical sites that show recurrence/metastasis of mesothelioma.

### **Metastatic Tissue Block Matrix:**

-Enter as many blocks available (Three blocks are preferred).

-If multiple metastatic sites are present, then enter at least 1 block from each site.

-Try to include at least one block of normal tissue from the same site if possible. If it is not possible to find a completely normal block, then include one with minimal amounts of tumor.

#### **1. Metastatic Block Matrix: Type(s) of Block(s) Available: (check one)**

Paraffin       Frozen       Both

#### **2. Date of Metastatic Block Matrix: \_\_ \_\_ / \_\_ \_\_ \_\_ \_\_ (MM/YYYY)**

#### **3. Metastatic Block Matrix: Block Number (i.e. 1A, 12AA): \_\_ \_\_ \_\_ \_\_**

#### **4. Metastatic Block Matrix: Specimen Source: (check one)**

Resection       Biopsy       Both       Not Specified

#### **5. Biopsy Block Matrix: Most Prominent Histological Type: (check one)**

Epithelial or epithelioid       Biphasic       Other  
 Sarcomatoid       Multicystic       Not Specified  
 Desmoplastic       Papillary       Unknown

#### **6. Metastatic Block Matrix: Size of Largest Individual Nodule of Invasive Cancer: \_\_ . \_\_ \_\_ cm**

#### **7. Metastatic Block Matrix: Presence of Therapy Effects: (check all that apply)**

Surgery       Immunotherapy       Watchful expectancy  
 Radiation therapy       Brachytherapy       Other  
 Chemotherapy       Cryotherapy       None  
 Hormone therapy       External beam

#### **8. Metastatic Block Matrix: Non-Neoplastic Block Number (i.e. 1A, 12AA):**

\_\_ \_\_ \_\_ \_\_

#### **9. General Comments Section for Metastatic Block Matrix: \_\_\_\_\_**

---

---

---

## GENOTYPES DATA

### 1. Genotype Data Available: (check one)

Yes       No       Unknown       Not assessed

### 2. GSTM1 Genotype: (check one)

Functional (0)       Null (2)

### 3. GSTTM1 Genotype: (check one)

Functional (0)       Null (2)

### 4. CYP1A1 Genotype: (check one)

Homozygous wild-type (0)       Heterozygous (1)       Homozygous variant (2)

### 5. NAT2 Genotype: (check one)

Slow (0)       Fast (1)

### 6. EPHX1 Genotype: (check one)

High (0)       Intermediate (1)       Low (2)

### 7. EPHX3 Genotype: (check one)

Homozygous wild-type (0)       Heterozygous (1)       Homozygous variant (2)

### 8. EPHX4 Genotype: (check one)

Homozygous wild-type (0)       Heterozygous (1)       Homozygous variant (2)





pM0     Not applicable

| AJCC (6 <sup>th</sup> Ed.) Staging |                                                   |
|------------------------------------|---------------------------------------------------|
| pMX                                | Presence of distant metastasis cannot be assessed |
| pM0                                | No known distant metastasis                       |
| pM1                                | Distant metastasis                                |

### Clinical Staging:

#### 1. cT Stage: (check one)

cTX                       cT1                       cT3                       Not applicable  
 cT0                       cT2                       cT4                       Unknown

| AJCC (6 <sup>th</sup> Ed.) Staging for Thoracic Mesothelioma |                                                                                                                                    |
|--------------------------------------------------------------|------------------------------------------------------------------------------------------------------------------------------------|
| cTX                                                          | Primary tumor cannot be assessed                                                                                                   |
| cT0                                                          | No evidence of primary tumor                                                                                                       |
| cT1                                                          | Tumor limited to ipsilateral parietal and/or visceral pleura                                                                       |
| cT2                                                          | Tumor invades any of the following: ipsilateral lung, endothoracic fascia, diaphragm, or pericardium                               |
| cT3                                                          | Tumor invades any of the following: ipsilateral chest wall muscle, ribs, or mediastinal organs or tissues                          |
| cT4                                                          | Tumor directly extends to any of the following: contralateral pleura, lung, peritoneum, intra-abdominal organs or cervical tissues |

#### 2. cN Stage: (check one)

cNX     cN1     cN3                       Unknown  
 cN0     cN2     Not applicable

| AJCC (6 <sup>th</sup> Ed.) Staging for Thoracic Mesothelioma |                                                                                                                                      |
|--------------------------------------------------------------|--------------------------------------------------------------------------------------------------------------------------------------|
| cNX                                                          | Regional lymph nodes cannot be assessed                                                                                              |
| cN0                                                          | No regional lymph node metastasis                                                                                                    |
| cN1                                                          | Metastasis in ipsilateral peribronchial and/or ipsilateral hilar lymph nodes, including direct extension                             |
| cN2                                                          | Metastasis in ipsilateral mediastinal and/or subcarinal lymph node(s)                                                                |
| cN3                                                          | Metastasis in contralateral mediastinal, contralateral hilar, ipsilateral or contralateral scalene, or supraclavicular lymph node(s) |

#### 3. cM Stage: (check one)

cMX                       cM1                       Unknown  
 cM0                       Not applicable

| AJCC (6 <sup>th</sup> Ed.) Staging |                                                   |
|------------------------------------|---------------------------------------------------|
| cMX                                | Presence of distant metastasis cannot be assessed |
| cM0                                | No distant metastasis                             |
| cM1                                | Distant metastasis                                |

**4. General Staging Comments:** \_\_\_\_\_

---

---

---

# THErapy RELATED DATA

Record the patient's treatment history.

\*1. Therapy matrix: Type of Therapy: (check all that apply)

- |                                            |                                        |                                              |
|--------------------------------------------|----------------------------------------|----------------------------------------------|
| <input type="checkbox"/> Surgery           | <input type="checkbox"/> Immunotherapy | <input type="checkbox"/> Watchful expectancy |
| <input type="checkbox"/> Radiation therapy | <input type="checkbox"/> Brachytherapy | <input type="checkbox"/> Other               |
| <input type="checkbox"/> Chemotherapy      | <input type="checkbox"/> Cryotherapy   | <input type="checkbox"/> None                |
| <input type="checkbox"/> Hormone therapy   | <input type="checkbox"/> External beam |                                              |

2. Therapy matrix: Therapy Start Date: \_\_\_ \_\_\_ / \_\_\_ \_\_\_ \_\_\_ \_\_\_ (MM/YYYY)

3. Presence of pleural effusion: (circle one)                      Yes                      No                      Unknown

4. Presence of ascites: (circle one)                      Yes                      No                      Unknown

5. Comments on Therapy Response: \_\_\_\_\_

\_\_\_\_\_

\_\_\_\_\_

6. General Overall Comments on Therapy: \_\_\_\_\_

\_\_\_\_\_

\_\_\_\_\_

## CLINICALLY VERIFIED TISSUE RECURRENCE/METASTASIS DATA

These cases are those that do NOT have tissue blocks available, but are known clinically to have a recurrence/metastasis.

NOTE: Verification for clinical recurrence can be via radiology imaging, biopsy/resection, surgery, or cancer registry. However, a clinician's note indicating recurrence in a specific distant site would be sufficient.

1. Date of Tissue Recurrence/Metastasis: Distant Site #1: \_\_\_ \_\_\_ / \_\_\_ \_\_\_ \_\_\_ \_\_\_  
(MM/YYYY)

2. Tissue Recurrence/Metastasis: Distant Site #1: (check one)

- |                                                       |                                                 |                                          |
|-------------------------------------------------------|-------------------------------------------------|------------------------------------------|
| <input type="checkbox"/> Adrenal                      | <input type="checkbox"/> Larynx                 | <input type="checkbox"/> Prostate        |
| <input type="checkbox"/> Anus                         | <input type="checkbox"/> Leukemia               | <input type="checkbox"/> Rectosigmoid    |
| <input type="checkbox"/> Appendix                     | <input type="checkbox"/> Liver                  | <input type="checkbox"/> Rectum          |
| <input type="checkbox"/> Bones                        | <input type="checkbox"/> Lung                   | <input type="checkbox"/> Skin            |
| <input type="checkbox"/> Breast                       | <input type="checkbox"/> Lymph node             | <input type="checkbox"/> Spleen          |
| <input type="checkbox"/> Brain & CNS                  | <input type="checkbox"/> Mesothelioma           | <input type="checkbox"/> Stomach         |
| <input type="checkbox"/> Colon                        | <input type="checkbox"/> Ovary                  | <input type="checkbox"/> Testis          |
| <input type="checkbox"/> Cervix Uteri                 | <input type="checkbox"/> Oral Cavity            | <input type="checkbox"/> Thyroid         |
| <input type="checkbox"/> Corpus Uteri                 | <input type="checkbox"/> Pancreatic             | <input type="checkbox"/> Urinary Bladder |
| <input type="checkbox"/> Esophagus                    | <input type="checkbox"/> Parotid & Other Glands | <input type="checkbox"/> Other, NOS      |
| <input type="checkbox"/> Gallbladder                  | <input type="checkbox"/> Pharynx                | <input type="checkbox"/> Unknown         |
| <input type="checkbox"/> Head and Neck                | <input type="checkbox"/> Larynx                 | <input type="checkbox"/> None            |
| <input type="checkbox"/> Kidney, Renal Pelvis, Ureter | <input type="checkbox"/> Pleura                 |                                          |

3. Tissue Recurrence/Metastasis: Distant Site #2: (check one)

- |                                                       |                                                 |                                          |
|-------------------------------------------------------|-------------------------------------------------|------------------------------------------|
| <input type="checkbox"/> Adrenal                      | <input type="checkbox"/> Larynx                 | <input type="checkbox"/> Prostate        |
| <input type="checkbox"/> Anus                         | <input type="checkbox"/> Leukemia               | <input type="checkbox"/> Rectosigmoid    |
| <input type="checkbox"/> Appendix                     | <input type="checkbox"/> Liver                  | <input type="checkbox"/> Rectum          |
| <input type="checkbox"/> Bones                        | <input type="checkbox"/> Lung                   | <input type="checkbox"/> Skin            |
| <input type="checkbox"/> Breast                       | <input type="checkbox"/> Lymph node             | <input type="checkbox"/> Spleen          |
| <input type="checkbox"/> Brain & CNS                  | <input type="checkbox"/> Mesothelioma           | <input type="checkbox"/> Stomach         |
| <input type="checkbox"/> Colon                        | <input type="checkbox"/> Ovary                  | <input type="checkbox"/> Testis          |
| <input type="checkbox"/> Cervix Uteri                 | <input type="checkbox"/> Oral Cavity            | <input type="checkbox"/> Thyroid         |
| <input type="checkbox"/> Corpus Uteri                 | <input type="checkbox"/> Pancreatic             | <input type="checkbox"/> Urinary Bladder |
| <input type="checkbox"/> Esophagus                    | <input type="checkbox"/> Parotid & Other Glands | <input type="checkbox"/> Other, NOS      |
| <input type="checkbox"/> Gallbladder                  | <input type="checkbox"/> Pharynx                | <input type="checkbox"/> Unknown         |
| <input type="checkbox"/> Head and Neck                | <input type="checkbox"/> Larynx                 | <input type="checkbox"/> None            |
| <input type="checkbox"/> Kidney, Renal Pelvis, Ureter | <input type="checkbox"/> Pleura                 |                                          |

4. Tissue Recurrence/Metastasis: Distant Site #3: (check one)

- |                                       |                                       |                                          |
|---------------------------------------|---------------------------------------|------------------------------------------|
| <input type="checkbox"/> Adrenal      | <input type="checkbox"/> Larynx       | <input type="checkbox"/> Prostate        |
| <input type="checkbox"/> Anus         | <input type="checkbox"/> Leukemia     | <input type="checkbox"/> Rectosigmoid    |
| <input type="checkbox"/> Appendix     | <input type="checkbox"/> Liver        | <input type="checkbox"/> Rectum          |
| <input type="checkbox"/> Bones        | <input type="checkbox"/> Lung         | <input type="checkbox"/> Skin            |
| <input type="checkbox"/> Breast       | <input type="checkbox"/> Lymph node   | <input type="checkbox"/> Spleen          |
| <input type="checkbox"/> Brain & CNS  | <input type="checkbox"/> Mesothelioma | <input type="checkbox"/> Stomach         |
| <input type="checkbox"/> Colon        | <input type="checkbox"/> Ovary        | <input type="checkbox"/> Testis          |
| <input type="checkbox"/> Cervix Uteri | <input type="checkbox"/> Oral Cavity  | <input type="checkbox"/> Thyroid         |
| <input type="checkbox"/> Corpus Uteri | <input type="checkbox"/> Pancreatic   | <input type="checkbox"/> Urinary Bladder |
| <input type="checkbox"/>              | <input type="checkbox"/>              | <input type="checkbox"/>                 |

- |                                                       |                                                 |                                     |
|-------------------------------------------------------|-------------------------------------------------|-------------------------------------|
| <input type="checkbox"/> Esophagus                    | <input type="checkbox"/> Parotid & Other Glands | <input type="checkbox"/> Other, NOS |
| <input type="checkbox"/> Gallbladder                  | <input type="checkbox"/> Pharynx                | <input type="checkbox"/> Unknown    |
| <input type="checkbox"/> Head and Neck                | <input type="checkbox"/> Larynx                 | <input type="checkbox"/> None       |
| <input type="checkbox"/> Kidney, Renal Pelvis, Ureter | <input type="checkbox"/> Pleura                 |                                     |

**5. General Comments for Clinically Verified Tissue Recurrence/Metastasis:\_\_\_\_\_**

---

---

---

---

## VITAL STATUS/FOLLOW-UP DATA

Record the patient's vital status and most recent follow up date.

\*1. Vital Status: (check one)

Alive                       Dead                       Unknown

\*2. Cancer Status: (check one)

No evidence of cancer       Evidence of cancer       Unknown

\*3. Date Last Known Alive: \_\_ \_\_ / \_\_ \_\_ \_\_ \_\_ (MM/YYYY)

4. Date of Death: \_\_ \_\_ / \_\_ \_\_ \_\_ \_\_ (MM/YYYY)

5. Cause of Death: (check one)

Directly       Indirectly       Not caused by cancer       Unknown

6. Final Comments: \_\_\_\_\_  
\_\_\_\_\_  
\_\_\_\_\_  
\_\_\_\_\_
